# Supplementary material
Source: Springer Nature journal article supplement (https://www.springermedizin.de/resource/supplementary/12888_2013_1566_MOESM6_ESM.pdf/9481380)
Supplement: MOESM6 [file 9481380]

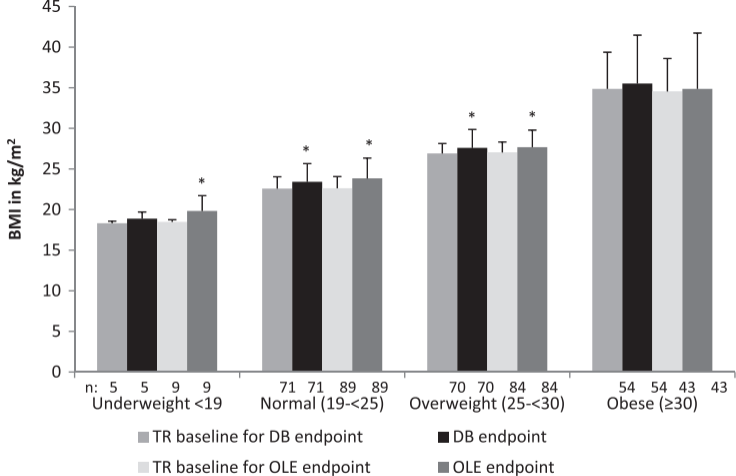

\* $p \leq 0.05$ . p-values are based on change from TR baseline scores and calculated using paired t-test. Baseline values are for those patients for whom both TR baseline and DB (or OLE) endpoint data were available. DB-double-blind; OLE-open-label extension; TR-transition; SD-standard deviation
